# Supplementary material
Source: publisher site journal article supplement (https://www.dovepress.com/article/582813)
Supplement: Supplementary file 1 [file 582813%20Revised%20Supplementary%20Material.docx]

**Supplement 1** Details of electroacupuncture treatment based on the revised STRICTA checklist

| **Item** | **Detail** | |
| --- | --- | --- |
| **1. Acupuncture rationale** | 1a) Style of acupuncture (e.g., Traditional Chinese Medicine, Japanese, Korean, Western medical, Five Element, ear acupuncture, etc.) | Electroacupuncture |
| 1b) Reasoning for treatment provided, based on historical context, literature sources, and/or consensus methods, with references where appropriate | 1) Previous clinical studies 28, 29, 30, 31 on acupuncture and electroacupuncture for insomnia  2) Expert consensus among Korean medicine specialists of Neuropsychiatry |
| 1c) Extent to which treatment was varied (individualized or standardized) | Standardized treatment |
| **2.**  **Details of Acupuncture** | 2a) Number of needle insertions per subject per session (mean and range where relevant) | 10 needles |
| 2b) Names (or location if no standard name) of points used (uni/bilateral) | - Baihui (GV20), Yintang (EX-HN3)  - Bilateral Shenmen (HT7), Neiguan (PC6), Dazhong (KI4), Jinmen (BL63) |
| 2c) Depth of insertion, based on a specified unit of measurement, or on a particular tissue level | 0.2–1.5 cun |
| 2d) Response sought (e.g., de qi or muscle twitch response) | After needle insertion, manual rotation was performed to elicit local deqi sensations (described as soreness, numbness, distention, and heaviness), Subsequently, electrical stimulation was applied at an intensity level that participants could comfortably perceive and tolerate. |
| 2e) Needle stimulation (e.g., manual, electrical) | Manual rotation was performed approximately 3–5 times bilaterally to induce deqi, followed by electrical stimulation at 4 Hz with an intensity that was noticeable yet comfortable for the participant. |
| 2f) Needle retention time | 30 minutes |
| 2g) Needle type (diameter, length, manufacturer/material) | Disposable, sterilized stainless steel needles, 0.25 × 30 mm (Dong-bang Acupuncture, Seoul, Korea) |
| **3.**  **Treatment regimen** | 3a) Number of treatment sessions | 12 sessions |
| 3b) Frequency and duration of treatment sessions | Twice a week for 6 weeks |
| **4.**  **Other components of treatment** | 4a) Details of other interventions administered to the experimental group (e.g., moxibustion, cupping, herbs, exercises, lifestyle advice) | - All groups received an educational brochure on sleep hygiene.  - No other Korean medicine treatments for insomnia were allowed during the trial period.  - Sleep medications that were consistently used before the intervention were maintained without modification throughout the study period.  - Pre-existing insomnia treatments stable for ≥4 weeks at baseline were continued unchanged, whereas addition of new therapies was prohibited during the study period. |
| 4b) Setting and context of treatment, including instructions to practitioners, and information and explanations to patients | - Settings: clinical trial centers in university Korean medicine hospital  - Non-treatment-related communication between practitioners and participants was limited. |
| **5.**  **Practitioner background** | 5) Practitioner qualifications (license, experience, other relevant background) | Two licensed Korean medicine doctors with over 10 years of clinical experience and board certification in Neuropsychiatry. |
| **6.**  **Control or comparator intervention** | 6a) Rationale for the control or comparator in the context of the research question, with sources that justify the choice(s) | Control group participants were provided with a sleep hygiene brochure. |
| 6b) Precise description of the control or comparator. If sham acupuncture or any other type of acupuncture-like control is used, provide details as for Items 1 to 3 above. | Not applicable. |

Abbreviation: STRICTA, The standards for reporting interventions in clinical trials of acupuncture.

**Supplement 2** Baseline insomnia severity index scores comparison between completers and dropouts

|  | **Completers**  **mean ± SD (n)** | **Dropouts**  **mean ± SD (n)** | ***p* value** |
| --- | --- | --- | --- |
| **Control group** | 18.78 ± 3.34 (18) | 20.00 ± 3.61 (7) | 0.38 |
| **Experimental group** | 19.79 ± 3.30 (24) | 17.00 (1) | N/A |

**Notes:** P value was calculated using Mann-Whitney U test.

Abbreviations: SD, Standard deviation; N/A, Not applicable.

**Supplement 3** Insomnia severity index scores by visit and group

|  | **Experimental group**  **LSM ± SE (n)** | | **Control group**  **LSM ± SE (n)** | | | | **Between-group**  ***p* value** |
| --- | --- | --- | --- | --- | --- | --- | --- |
| **Mean Insomnia severity index scores at each visit** | | | | | | | |
| BL | 18.08 ± 0.81 (25) | | 18.29 ± 0.83 (24) | | | | 0.86 |
| W2 | 13.16 ± 0.81 (25) | | 15.90 ± 0.86 (22) | | | | 0.02* |
| W4 | 11.83 ± 0.83 (23) | | 15.27 ± 0.92 (18) | | | | 0.008** |
| W6 | 10.66 ± 0.82 (24) | | 14.93 ± 0.92 (18) | | | | 0.001** |
| F/U | 10.45 ± 0.82 (24) | | 14.99 ± 0.92 (18) | | | | <0.001*** |
|  | **Experimental group**  **LSM ± SE** | **Within-group**  ***p* value** | | **Control group**  **LSM ± SE** | | **Within-group**  ***p* value** | |
| **Within-group differences by visit** | | | | | | | |
| BL - W2 | 4.92 ± 0.83 | <.0001*** | | 2.40 ± 0.87 | | 0.05 | |
| BL - W4 | 6.25 ± 0.85 | <.0001*** | | 3.02 ± 0.94 | | 0.01* | |
| BL - W6 | 7.42 ± 0.84 | <.0001*** | | 3.36 ± 0.94 | | 0.004** | |
| BL – F/U | 7.63 ± 0.84 | <.0001*** | | 3.30 ± 0.94 | | 0.005** | |
| **Group effect** | | | | | **F*(p)*** | | 12.89 (<0.001***) |
| **Time effect** | | | | | **F*(p)*** | | 28.63 (<0.001***) |
| **Interaction group × time** | | | | | **F*(p)*** | | 3.85 (0.005**) |

**Notes:** * p < 0.05; ** p < 0.01; *** p < 0.001

P values were calculated using linear mixed-effect models. Post hoc comparisons were adjusted using the Tukey method.

Abbreviations: LSM, Least square mean; SE, Standard error; BL, Baseline; W2, Week 2; W4, Week 4; W6, Week 6; F/U, 4-week follow-up

**Supplement 4** Pittsburgh sleep quality index scores by visit and group

|  | **Experimental group**  **LSM ± SE (n)** | | | **Control group**  **LSM ± SE (n)** | | | | **Between-group *p* value** |
| --- | --- | --- | --- | --- | --- | --- | --- | --- |
| **Mean Pittsburgh sleep quality index scores at each visit** | | | | | | | | |
| BL | 13.60 ± 0.53 (25) | | | 13.21 ± 0.54 (24) | | | | 0.61 |
| W2 | 13.16 ± 0.53 (25) | | | 12.84 ± 0.56 (22) | | | | 0.68 |
| W4 | 11.69 ± 0.54 (23) | | | 13.17 ± 0.59 (18) | | | | 0.07 |
| W6 | 11.65 ± 0.54 (24) | | | 13.23 ± 0.59 (18) | | | | 0.05 |
| F/U | 10.77 ± 0.54 (24) | | | 12.78 ± 0.59 (18) | | | | 0.01* |
|  | **Experimental group**  **LSM ± SE** | | **Within-group**  ***p* value** | | **Control group**  **LSM ± SE** | | **Within-group**  ***p* value** | |
| **Within-group differences by visit** | |  | |  | |  | |  |
| BL – W2 | 0.44 ± 0.45 | | 0.86 | | 0.37 ± 0.47 | | 0.94 | |
| BL – W4 | 1.91 ± 0.46 | | <0.001*** | | 0.04 ± 0.51 | | 1.00 | |
| BL – W6 | 1.95 ± 0.45 | | <0.001*** | | –0.02 ± 0.51 | | 1.00 | |
| BL - F/U | 2.83 ± 0.45 | | <0.001*** | | 0.43 ± 0.51 | | 0.92 | |
| **Group effect** | | | | | | **F*(p)*** | | 1.64 (0.21) |
| **Time effect** | | | | | | **F*(p)*** | | 8.11 (<0.001***) |
| **Interaction group × time** | | | | | | **F*(p)*** | | 5.42 (<0.001***) |

**Notes:** * p < 0.05; ** p < 0.01; *** p < 0.001

P values were calculated using linear mixed-effect models. Within-group comparisons by visit were derived from post hoc analyses adjusted by the Tukey method.

Abbreviations: LSM, Least square mean; SE, Standard error; BL, Baseline; W2, Week 2; W4, Week 4; W6, Week 6; F/U, 4-week follow-up





**Supplement 5** Changes in sleep parameters derived from sleep diary

**Notes:** Within-group comparison: *** p < 0.001. (A) Total sleep time, (B) Sleep onset latency, (C) Sleep efficiency, (D) Number of awakenings, (E) Proportion of participants reporting morning refreshment. All data are presented as least square means ± standard error. (A), (B), and (C) were calculated using linear mixed-effects model, (D) was calculated using generalized linear mixed-effect model, and (E) was calculated using cumulative link mixed model. All post hoc comparisons were adjusted using the Tukey method.

**Supplement 6** Total sleep time derived from sleep diary at each visit

| **Mean total sleep time at each visit (hours)** | | | | | | | |
| --- | --- | --- | --- | --- | --- | --- | --- |
|  | **Experimental group**  **LSM ± SE (n)** | | **Control group**  **LSM ± SE (n)** | | | | **Between-group *p* value** |
| BL | 5.61 ± 0.24 (25) | | 5.64 ± 0.24 (24) | | | | 0.92 |
| W2 | 5.70 ± 0.24 (25) | | 5.79 ± 0.24 (21) | | | | 0.79 |
| W4 | 5.77 ± 0.24 (25) | | 5.84 ± 0.24 (19) | | | | 0.84 |
| W6 | 5.91 ± 0.24 (24) | | 5.74 ± 0.24 (18) | | | | 0.62 |
| F/U | 5.89 ± 0.24 (24) | | 5.78 ± 0.25 (18) | | | | 0.75 |
| **Within-group differences by visit (hours)** | | | | | | | |
|  | **Experimental group**  **LSM ± SE** | **Within-group**  ***p* value** | | **Control group**  **LSM ± SE** | | **Within-group**  ***p* value** | |
| BL - W2 | -0.09 ± 0.09 | 0.75 | | -0.15 ± 0.08 | | 0.37 | |
| BL - W4 | -0.16 ± 0.08 | 0.21 | | -0.20 ± 0.08 | | 0.13 | |
| BL - W6 | -0.30 ± 0.08 | <0.001*** | | -0.10 ± 0.08 | | 0.76 | |
| BL – F/U | -0.28 ± 0.08 | 0.007** | | -0.14 ± 0.10 | | 0.59 | |
| **Group effect** | | | | | **F*(p)*** | | 0.01 (0.93) |
| **Time effect** | | | | | **F*(p)*** | | 4.82 (<0.001***) |
| **Interaction group × time** | | | | | **F*(p)*** | | 2.63 (0.03*) |

**Notes:** * p < 0.05; ** p < 0.01; *** p < 0.001. P values were calculated using linear mixed-effect models. Post hoc comparisons were adjusted using the Tukey method.

Abbreviation: LSM, Least square mean; SE, Standard error; BL, Baseline; W2, Week 2; W4, Week 4; W6, Week 6; F/U, 4-week follow-up

**Supplement 7** Sleep onset latency derived from sleep diary at each visit

|  | **Experimental group**  **LSM ± SE (n)** | | **Control group**  **LSM ± SE (n)** | | | | **Between-group *p* value** |
| --- | --- | --- | --- | --- | --- | --- | --- |
| **Mean sleep onset latency at each visit (minutes)** | | | | | | | |
| BL | 51.13 ± 5.62 (25) | | 51.19 ± 5.73 (24) | | | | 0.99 |
| W2 | 43.56 ± 5.49 (25) | | 47.70 ± 5.66 (21) | | | | 0.60 |
| W4 | 41.80 ± 5.50 (25) | | 46.55 ± 5.69 (19) | | | | 0.55 |
| W6 | 36.37 ± 5.50 (24) | | 45.91 ± 5.70 (18) | | | | 0.23 |
| F/U | 38.43 ± 5.59 (24) | | 47.43 ± 5.83 (18) | | | | 0.27 |
|  | **Experimental group**  **LSM ± SE** | **Within-group**  ***p* value** | | **Control group**  **LSM ± SE** | | **Within-group**  ***p* value** | |
| **Within-group differences by visit (minutes)** | | | | | | | |
| BL - W2 | 7.57 ± 2.13 | 0.004** | | 3.48 ± 2.31 | | 0.56 | |
| BL - W4 | 9.32 ± 2.15 | <0.001*** | | 4.64 ± 2.38 | | 0.29 | |
| BL - W6 | 14.75 ± 2.16 | <0.001*** | | 5.28 ± 2.40 | | 0.18 | |
| BL – F/U | 12.70 ± 2.38 | <0.001*** | | 3.76 ± 2.70 | | 0.63 | |
| **Group effect** | | | | | **F*(p)*** | | 0.66 (0.42) |
| **Time effect** | | | | | **F*(p)*** | | 11.78 (<0.001***) |
| **Interaction group × time** | | | | | **F*(p)*** | | 2.80 (0.02*) |

**Notes:** * p < 0.05; ** p < 0.01; *** p < 0.001. P values were calculated using linear mixed-effect models. Post hoc comparisons were adjusted using the Tukey method.

Abbreviation: LSM, Least square mean; SE, Standard error; BL, Baseline; W2, Week 2; W4, Week 4; W6, Week 6; F/U, 4-week follow-up

|  | **Experimental group**  **LSM ± SE (n)** | | **Control group**  **LSM ± SE (n)** | | | **Between-group**  ***p* value** | | |
| --- | --- | --- | --- | --- | --- | --- | --- | --- |
| **Mean sleep efficiency at each visit (%)** | | | | | | | | |
| BL | 81.95 ± 2.17 (25) | | 84.04 ± 2.21 (24) | | | 0.50 | | |
| W2 | 84.07 ± 2.11 (25) | | 86.17 ± 2.18 (21) | | | 0.51 | | |
| W4 | 83.80 ± 2.12 (25) | | 87.00 ± 2.20 (19) | | | 0.29 | | |
| W6 | 84.93 ± 2.12 (24) | | 86.41 ± 2.20 (18) | | | 0.62 | | |
| F/U | 83.90 ± 2.16 (24) | | 86.22 ± 2.26 (18) | | | 0.46 | | |
|  | **Experimental group**  **LSM ± SE** | **Within-group**  ***p* value** | | **Control group**  **LSM ± SE** | | | **Within-group**  ***p* value** | |
| **Within-group differences by visit (%)** | | | | | | | | |
| BL - W2 | -2.12 ± 0.86 | 0.10 | | -2.13 ± 0.94 | | | 0.15 | |
| BL - W4 | -1.85 ± 0.87 | 0.21 | | -2.97 ± 0.97 | | | 0.02* | |
| BL - W6 | -2.98 ± 0.87 | 0.006** | | -2.38 ± 0.98 | | | 0.11 | |
| BL – F/U | -1.95 ± 0.96 | 0.26 | | -2.18 ± 1.10 | | | 0.27 | |
| **Group effect** | | | | | **F*(p)*** | | | 0.43 (0.51) |
| **Time effect** | | | | | **F*(p)*** | | | 4.77 (<0.001***) |
| **Interaction group × time** | | | | | **F*(p)*** | | | 0.63 (0.64) |

**Supplement 8** Sleep efficiency derived from sleep diary at each visit

**Notes:** * p < 0.05; ** p < 0.01; *** p < 0.001. P values were calculated using linear mixed-effect models. Post hoc comparisons were adjusted using the Tukey method.

Abbreviation: LSM, Least square mean; SE, Standard error; BL, Baseline; W2, Week 2; W4, Week 4; W6, Week 6; F/U, 4-week follow-up

**Supplement 9** Number of awakenings derived from sleep diary at each visit

|  | **Experimental group**  **LSM ± SE (n)** | | **Control group**  **LSM ± SE (n)** | | | **Between-group**  ***p* value** |
| --- | --- | --- | --- | --- | --- | --- |
| **Mean number of awakenings at each visit (times)** | | | | | | |
| BL | 1.47 ± 0.23 (25) | | 1.35 ± 0.22 (24) | | | 0.71 |
| W2 | 1.33 ± 0.20 (25) | | 1.14 ± 0.19 (21) | | | 0.48 |
| W4 | 1.31 ± 0.20 (25) | | 1.21 ± 0.19 (19) | | | 0.69 |
| W6 | 1.21 ± 0.18 (24) | | 1.31 ± 0.21 (18) | | | 0.74 |
| F/U | 1.27 ± 0.20 (24) | | 1.18 ± 0.19 (18) | | | 0.76 |
|  | **ratio ± SE** | **Within-group**  ***p* value** | | **ratio ± SE** | **Within-group**  ***p* value** | |
| **Within-group differences by visit** | | | | | | |
| BL / W2 | 1.11 ± 0.07 | 0.53 | | 1.19 ± 0.09 | 0.14 | |
| BL / W4 | 1.12 ± 0.08 | 0.45 | | 1.12 ± 0.09 | 0.56 | |
| BL / W6 | 1.21 ± 0.09 | 0.04* | | 1.04 ± 0.08 | 0.99 | |
| BL / F/U | 1.16 ± 0.08 | 0.29 | | 1.15 ± 0.10 | 0.52 | |

**Notes:** * p < 0.05. P values were calculated using generalized linear mixed-effect models. Within-group comparisons by visit were derived from post hoc analyses adjusted by the Tukey method.

Abbreviation: LSM, Least square mean; SE, Standard error; BL, Baseline; W2, Week 2; W4, Week 4; W6, Week 6; F/U, 4-week follow-up

**Supplement 10** Morning refreshment derived from sleep diary at each visit

|  | **Experimental group**  **LSM ± SE (n)** | | **Control group**  **LSM ± SE (n)** | | | **Between-group**  ***p* value** | |
| --- | --- | --- | --- | --- | --- | --- | --- |
| **Mean morning refreshment at each visit** | | | | | | | |
| BL | 2.33 ± 0.37 (25) | | 2.57 ± 0.39 (24) | | | 0.65 | |
| W2 | 1.81 ± 0.35 (25) | | 3.02 ± 0.38 (21) | | | 0.02* | |
| W4 | 1.31 ± 0.35 (25) | | 2.99 ± 0.38 (19) | | | 0.001** | |
| W6 | 1.20 ± 0.35 (24) | | 2.67 ± 0.38 (18) | | | 0.004** | |
| F/U | 1.18 ± 0.36 (24) | | 2.54 ± 0.40 (18) | | | 0.01* | |
|  | **Experimental group**  **LSM ± SE** | **Within-group**  ***p* value** | | **Control group**  **LSM ± SE** | | | **Within-group**  ***p* value** |
| **Within-group differences by visit** | | | | | | | |
| W2 - BL | -0.52 ± 0.20 | 0.06 | | 0.45 ± 0.23 | | | 0.27 |
| W4 - BL | -1.02 ± 0.20 | <0.001*** | | 0.42 ± 0.24 | | | 0.38 |
| W6 - BL | -1.14 ± 0.20 | <0.001*** | | 0.10 ± 0.24 | | | 0.99 |
| F/U - BL | -1.15 ± 0.22 | <0.001*** | | -0.03 ± 0.26 | | | 1.00 |
| **Group effect** | | | | | **χ²*(p)*** | 6.06 (0.01**) | |
| **Time effect** | | | | | **χ²*(p)*** | 33.87 (<0.001***) | |
| **Interaction group × time** | | | | | **χ²(*p*)** | 23.84 (<0.001***) | |

**Notes:** * p < 0.05; ** p < 0.01; *** p < 0.001. Morning refreshment was categorized into Refreshed(1), Somewhat Refreshed(2), and Fatigued(3). P values were calculated using cumulative link mixed models. Within-group comparisons by visit were derived from post hoc analyses adjusted by the Tukey method.

Abbreviation: LSM, Least square mean; SE, Standard error; BL, Baseline; W2, Week 2; W4, Week 4; W6, Week 6; F/U, 4-week follow-up





**Supplement 11** Changes in sleep parameters derived from actigraphy

**Notes:** (A) Total sleep time, (B) Wake after sleep onset, (C) Number of awakenings, (D) Average awakening length, and (E) Sleep efficiency. All data are presented as least square means ± standard error. (A), (B), (D), and (E) were calculated using linear mixed-effects model and (C) was calculated using generalized linear mixed-effect model. All post hoc comparisons were adjusted using the Tukey method.

**Supplement 12** Total sleep time derived from actigraphy at each visit

|  | **Experimental group**  **LSM ± SE (n)** | | | **Control group**  **LSM ± SE (n)** | | | | **Between-group**  ***p* value** | | |
| --- | --- | --- | --- | --- | --- | --- | --- | --- | --- | --- |
| **Mean total sleep time at each visit (minutes)** | | | | | | | | | | |
| BL | 335.90 ± 13.02 (25) | | | 325.21 ± 13.29 (24) | | | | 0.57 | | |
| W2 | 333.38 ± 13.02 (25) | | | 335.23 ± 13.59 (21) | | | | 0.92 | | |
| W4 | 345.44 ± 13.02 (25) | | | 328.67 ± 13.78 (19) | | | | 0.38 | | |
| W6 | 343.88 ± 13.15 (23) | | | 326.96 ± 13.88 (18) | | | | 0.38 | | |
| F/U | 345.85 ± 13.15 (23) | | | 322.58 ± 13.99 (17) | | | | 0.23 | | |
|  | **Experimental group**  **LSM ± SE** | **Within-group**  ***p* value** | | | **Control group**  **LSM ± SE** | | | | **Within-group**  ***p* value** | |
| **Within-group differences by visit (minutes)** | | | | | | | | | | |
| BL - W2 | 2.53 ± 7.67 | | 1.00 | | | -10.02 ± 8.32 | | | 0.75 | |
| BL - W4 | -9.54 ± 7.67 | | 0.73 | | | -3.46 ± 8.64 | | | 1.00 | |
| BL - W6 | -7.98 ± 7.88 | | 0.85 | | | -1.75 ± 8.80 | | | 1.00 | |
| BL - F/U | -9.94 ± 7.88 | | 0.72 | | | 2.63 ± 8.96 | | | 1.00 | |
| **Group effect** | | | | | | | **F*(p)*** | | | 0.55 (0.46) |
| **Time effect** | | | | | | | **F*(p)*** | | | 0.43 (0.79) |
| **Interaction group × time** | | | | | | | **F*(p)*** | | | 1.29 (0.28) |

**Notes:** P values were calculated using linear mixed-effect models. Post hoc comparisons were adjusted using the Tukey method.

Abbreviation: LSM, Least square mean; SE, Standard error; BL, Baseline; W2, Week 2; W4, Week 4; W6, Week 6; F/U, 4-week follow-up

**Supplement 13** Wake after sleep onset derived from actigraphy at each visit

|  | **Experimental group**  **LSM ± SE (n)** | | **Control group**  **LSM ± SE (n)** | | | | | **Between-group**  ***p* value** | |
| --- | --- | --- | --- | --- | --- | --- | --- | --- | --- |
| **Mean WASO at each visit** | | | | | | | | | |
| BL | 72.06 ± 7.72 (25) | | | 75.58 ± 7.88 (24) | | | | | 0.75 |
| W2 | 67.97 ± 7.72 (25) | | | 60.29 ± 8.19 (21) | | | | | 0.50 |
| W4 | 67.16 ± 7.72 (25) | | | 71.62 ± 8.40 (19) | | | | | 0.70 |
| W6 | 70.60 ± 7.86 (23) | | | 65.91 ± 8.51 (18) | | | | | 0.69 |
| F/U | 66.63 ± 7.86 (23) | | | 77.87 ± 8.62 (17) | | | | | 0.34 |
|  | **Experimental group**  **LSM ± SE** | **Within-group**  ***p* value** | | | **Control group**  **LSM ± SE** | | **Within-group**  ***p* value** | | |
| **Within-group differences by visit** | | | | | | | | | |
| BL - W2 | 4.09 ± 6.31 | 0.97 | | | 15.29 ± 6.81 | | 0.17 | | |
| BL - W4 | 4.90 ± 6.31 | 0.94 | | | 3.97 ± 7.06 | | 0.98 | | |
| BL - W6 | 1.46 ± 6.48 | 1.00 | | | 9.68 ± 7.19 | | 0.66 | | |
| BL – F/U | 5.43 ± 6.48 | 0.92 | | | -2.29 ± 7.33 | | 1.00 | | |
| **Group effect** | | | | | | **F*(p)*** | | | 0.03 (0.87) |
| **Time effect** | | | | | | **F*(p)*** | | | 1.09 (0.36) |
| **Interaction group × time** | | | | | | **F*(p)*** | | | 1.20 (0.31) |

**Notes:** P values were calculated using linear mixed-effect models. Post hoc comparisons were adjusted using the Tukey method.

Abbreviation: LSM, Least square mean; SE, Standard error; BL, Baseline; W2, Week 2; W4, Week 4; W6, Week 6; F/U, 4-week follow-up

**Supplement 14** Number of awakenings derived from actigraphy at each visit

|  | **Experimental group**  **LSM ± SE (n)** | | **Control group**  **LSM ± SE (n)** | | **Between-group**  ***p* value** |
| --- | --- | --- | --- | --- | --- |
| **Mean number of awakenings at each visit (times)** | | | | | |
| BL | 16.46 ± 1.30 (25) | | 15.97 ± 1.30 (24) | | 0.79 |
| W2 | 16.09 ± 1.28 (25) | | 15.00 ± 1.28 (21) | | 0.55 |
| W4 | 15.80 ± 1.26 (25) | | 16.21 ± 1.41 (19) | | 0.83 |
| W6 | 16.52 ± 1.33 (23) | | 16.73 ± 1.46 (18) | | 0.91 |
| F/U | 16.31 ± 1.31 (23) | | 16.66 ± 1.49 (17) | | 0.86 |
|  | **Experimental group**  **log ± SE** | **Within-group**  ***p* value** | | **Control group**  **log ± SE** | **Within-group**  ***p* value** |
| **Within-group differences by visit (ratio)** | | | | | |
| BL / W2 | 1.02 ± 0.07 | 1.00 | | 1.06 ± 0.08 | 0.92 |
| BL / W4 | 1.04 ± 0.07 | 0.98 | | 0.99 ± 0.08 | 1.00 |
| BL / W6 | 1.00 ± 0.07 | 1.00 | | 0.95 ± 0.07 | 0.98 |
| BL / F/U | 1.01 ± 0.07 | 1.00 | | 0.96 ± 0.08 | 0.98 |

**Notes:** P values were calculated using generalized linear mixed-effect models. Within-group comparisons by visit were derived from post hoc analyses adjusted by the Tukey method.

Abbreviation: LSM, Least square mean; SE, Standard error; BL, Baseline; W2, Week 2; W4, Week 4; W6, Week 6; F/U, 4-week follow-up

**Supplement 15** Average awakening length derived from actigraphy at each visit

|  | **Experimental group**  **LSM ± SE (n)** | | **Control group**  **LSM ± SE (n)** | | | **Between-group**  ***p* value** |
| --- | --- | --- | --- | --- | --- | --- |
| **Mean average awakening length at each visit (minutes)** | | | | | | |
| BL | 4.52 ± 0.54 (25) | | 5.45 ± 0.55 (24) | | | 0.23 |
| W2 | 4.16 ± 0.54 (25) | | 4.19 ± 0.59 (21) | | | 0.96 |
| W4 | 4.20 ± 0.54 (25) | | 4.77 ± 0.61 (19) | | | 0.49 |
| W6 | 4.40 ± 0.56 (23) | | 3.96 ± 0.63 (18) | | | 0.60 |
| F/U | 4.51 ± 0.56 (23) | | 5.51 ± 0.65 (17) | | | 0.25 |
|  | **Experimental group**  **LSM ± SE** | **Within-group**  ***p* value** | | **Control group**  **LSM ± SE** | | **Within-group**  ***p* value** |
| **Within-group differences by visit (minutes)** | | | | | | |
| BL - W2 | 0.37 ± 0.67 | 0.98 | | 1.26 ± 0.72 | | 0.40 |
| BL - W4 | 0.32 ± 0.67 | 0.99 | | 0.68 ± 0.74 | | 0.89 |
| BL - W6 | 0.12 ± 0.69 | 1.00 | | 1.49 ± 0.75 | | 0.27 |
| BL – F/U | 0.01 ± 0.69 | 1.00 | | -0.06 ± 0.76 | | 0.40 |
| **Group effect** | | | | | **F*(p)*** | 0.86 (0.36) |
| **Time effect** | | | | | **F*(p)*** | 1.14 (0.34) |
| **Interaction group × time** | | | | | **F*(p)*** | 0.70 (0.59) |

**Notes:** P values were calculated using linear mixed-effect models. Post hoc comparisons were adjusted using the Tukey method.

Abbreviation: LSM, Least square mean; SE, Standard error; BL, Baseline; W2, Week 2; W4, Week 4; W6, Week 6; F/U, 4-week follow-up

**Supplement 16** Sleep efficiency derived from actigraphy at each visit

|  | **Experimental group**  **LSM ± SE (n)** | | | | **Control group**  **LSM ± SE (n)** | | | | | **Between-group**  ***p* value** | | |
| --- | --- | --- | --- | --- | --- | --- | --- | --- | --- | --- | --- | --- |
| **Mean sleep efficiency at each visit (%)** | | | | | | | | | | | | |
| BL | 81.73 ± 1.62 (25) | | | | 79.71 ± 1.65 (24) | | | | | 0.39 | | |
| W2 | 82.22 ± 1.62 (25) | | | | 82.34 ± 1.71 (21) | | | | | 0.96 | | |
| W4 | 83.22 ± 1.62 (25) | | | | 81.42 ± 1.74 (19) | | | | | 0.45 | | |
| W6 | 81.96 ± 1.64 (23) | | | | 81.37 ± 1.76 (18) | | | | | 0.86 | | |
| F/U | 82.54 ± 1.64 (23) | | | | 79.61 ± 1.78 (17) | | | | | 0.23 | | |
|  | **Experimental group**  **LSM ± SE** | | **Within-group**  ***p* value** | | | | **Control group**  **LSM ± SE** | | | | **Within-group**  ***p* value** | |
| **Within-group differences by visit (%)** | | | | | | | | | | | | |
| BL - W2 | -0.49 ± 1.20 | | | 0.99 | | | | -2.63 ± 1.30 | | | 0.26 | |
| BL - W4 | -1.49 ± 1.20 | | | 0.73 | | | | -1.71 ± 1.34 | | | 0.71 | |
| BL - W6 | 0.23 ± 1.23 | | | 1.00 | | | | -2.67 ± 1.37 | | | 0.30 | |
| BL - F/U | -0.81 ± 1.23 | | | 0.96 | | | | 0.10 ± 1.39 | | | 1.00 | |
| **Group effect** |  |  | | | |  | | | **F*(p)*** | | | 0.44 (0.51) |
| **Time effect** |  |  | | | |  | | | **F*(p)*** | | | 1.24 (0.29) |
| **Interaction group × time** | |  | | | |  | | | **F*(p)*** | | | 1.21 (0.31) |

**Notes:** P values were calculated using linear mixed-effect models. Post hoc comparisons were adjusted using the Tukey method.

Abbreviation: LSM, Least square mean; SE, Standard error; BL, Baseline; W2, Week 2; W4, Week 4; W6, Week 6; F/U, 4-week follow-up

**Supplement 17** Changes in EQ-5D-3L, EQ-VAS, and SF-36 scores

|  | **Experimental group**  **(n=24)** | **Control group**  **(n=18)** | **between-group** ***p* value** |
| --- | --- | --- | --- |
| **EQ-5D-3L, mean±SD** | | | |
| BL | 0.86 ± 0.10 | 0.86 ± 0.13 |  |
| W6 | 0.89 ± 0.10 | 0.83 ± 0.12 |  |
| W6-BL | 0.03 ± 0.09 | -0.03 ± 0.11 | 0.08 |
| Within-group p value | 0.124 | 0.324 |  |
| **EQ-VAS, mean±SD** |  |  |  |
| BL | 65.96 ± 13.23 | 70.08 ± 15.20 |  |
| W6 | 71.22 ± 14.22 | 65.83 ± 14.27 |  |
| W6-BL | -6.83 ± 12.40 | -5.39 ± 12.12 | 0.002** |
| Within-group p value | 0.013* | 0.076 |  |
| **SF-36, mean±SD** |  |  |  |
| **PCS** |  |  |  |
| BL | 46.02±6.79 | 51.53±7.59 |  |
| W6 | 47.35±7.17 | 49.56±8.23 |  |
| W6-BL | 1.33±6.05 | -1.98±4.71 | 0.056 |
| Within-group p value | 0.294 | 0.093 |  |
| **MCS** |  |  |  |
| BL | 38.73±13.07 | 39.61±12.79 |  |
| W6 | 42.24±11.52 | 37.21±15.13 |  |
| W6-BL | 3.51±8.74 | -2.40±9.07 | 0.037* |
| Within-group p value | 0.061 | 0.277 |  |
| **SF-36 total** |  |  |  |
| BL | 84.75±15.56 | 91.14±15.58 |  |
| W6 | 89.59±16.13 | 86.76±16.75 |  |
| W6-BL | 4.84±9.92 | -4.38±11.32 | 0.007** |
| Within-group p value | 0.025* | 0.119 |  |

**Notes:** * p < 0.05; ** p < 0.01. P values were calculated using independent t-test for between-group comparisons, and paired t-test for within-group comparisons.

Abbreviation: BL, Baseline; W6, Week 6; SD, Standard Deviation; EQ-5D-3L, EuroQol five-dimension three-level questionnaire; EQ-VAS, EuroQol visual analogue scale; SF-36, Short form health survey-36; PCS, Physical component summary; MCS, Mental component summary.
